# Supplementary material
Source: MDPI journal article supplement (https://www.mdpi.com/2073-4395/13/4/1098)
Supplement: s1 [file s1]

**Table S1.** Database on studies comparing SRI with conventional management practices (CMP), either RP or FP in different countries.

| Country     | Location / Settings                                                                                                                                           | CMP (RP or FP) | CMP yield (t ha <sup>-1</sup> ) | SRI yield (t ha <sup>-1</sup> ) | SRI yield deviation (%) | Comments                                                                                                                                                                                                                                                                                                                                                                                                                                                                     | Reference |
|-------------|---------------------------------------------------------------------------------------------------------------------------------------------------------------|----------------|---------------------------------|---------------------------------|-------------------------|------------------------------------------------------------------------------------------------------------------------------------------------------------------------------------------------------------------------------------------------------------------------------------------------------------------------------------------------------------------------------------------------------------------------------------------------------------------------------|-----------|
| Afghanistan | Baghlan and Takhar Provinces (FF)                                                                                                                             | FP             | 5.13                            | 9.03                            | 76                      | n=42; Yield of average in three districts, 2 <sup>nd</sup> year yield of SRI reached 10.5 t ha <sup>-1</sup> as a 1 <sup>st</sup> crop and 9.0 t ha <sup>-1</sup> as a second crop; yield increased by increasing the number of weedings.                                                                                                                                                                                                                                    | [49]      |
| Bangladesh  | BINA Sub-station, Gopalganj (ES)                                                                                                                              | RP             | 6.67                            | 7.00                            | 5                       | Greater yield under SRI was found to be mostly due to higher grain weight.                                                                                                                                                                                                                                                                                                                                                                                                   | [50]      |
| Bangladesh  | Sher-e-Bangla Agricultural University (ES)                                                                                                                    | RP             | 6.59                            | 7.62                            | 16                      | Eight varieties tested; yield ranged between 5.2-9.8 t ha <sup>-1</sup> under SRI and 5.2-7.9 t ha <sup>-1</sup> under CMP.                                                                                                                                                                                                                                                                                                                                                  | [51]      |
| Bangladesh  | Bangladesh Rice Research Institute Regional Station, Comilla (ES /FF)                                                                                         | RP             | 7.64                            | 7.11                            | -7                      | BMP; highest SRI yield was at 25x15 cm; no effect seen for seedling age, or for organic manure as the substitution of urea; better than FP                                                                                                                                                                                                                                                                                                                                   | [52]      |
| Bangladesh  | Bangladesh Rice Research Institute Regional Station, Comilla (ES/FF)                                                                                          | RP             | 7.79                            | 7.45                            | -4                      | BMP; found best spacing for SRI was 25x15 cm, but when comparing SRI with BMP, 25x25 cm spacing was used for SRI                                                                                                                                                                                                                                                                                                                                                             | [53]      |
| Benin       | Kakanitchoé and Dogba (OFT)                                                                                                                                   | FP             | 5.47                            | 8.24                            | 51                      | SRI methods could increase average yields under farmer conditions by 50% with 87% less seeds and crop period shortened by 14 days; however, 36% more labor was required under SRI.                                                                                                                                                                                                                                                                                           | [54]      |
| Brazil      | EMBRAPA Research Station, Arari County, Maranhão State (ES)                                                                                                   | RP             | 6.20                            | 5.70                            | -8                      | NS; under SRI, increase in tillering and individual plant biomass compensated for the lower plant density; found no beneficial effect of aerobic water regime, organic fertilization; however, recorded benefits of low-density transplanting over direct-seeding.                                                                                                                                                                                                           | [55]      |
| Cambodia    | Tramkak District, Takeo Province (FF)                                                                                                                         | FP             | 3.10                            | 3.51                            | 13                      | Higher rice yield at narrower spacing suggested that the wider spacing in SRI is not advisable, especially in 'nutrient-poor soil'; crop-animal integration required to increase agricultural productivity for smallholder farmers on their infertile Cambodian soils.                                                                                                                                                                                                       | [56]      |
| Cambodia    | Kong Pisei District, Kampong Speu Province (FF)                                                                                                               | FP             | 2.30                            | 2.70                            | 17                      | NS; farmers found less labor and seed was required for SRI.                                                                                                                                                                                                                                                                                                                                                                                                                  | [57]      |
| China       | Jiaying Agriculture Research Institute (ES)                                                                                                                   | RP             | 8.70                            | 10.93                           | 26                      | 120 kg N from chemical sources+60 kg N from organic sources gave highest yield; SRI produced significantly higher grain yield than CMP under transplanting and mechanical transplanting (MT), but not under direct-seeding or seedling casting.                                                                                                                                                                                                                              | [58]      |
| China       | China National Rice Research Institute, Hangzhou (ES)                                                                                                         | RP             | 7.47                            | 8.78                            | 18                      | Yield difference was mainly due to use of single seedlings, AWD, and INM (50% chemical + 50% organic) in SRI plots. Plant population was maintained the same for both the systems, so wider spacing not tested.                                                                                                                                                                                                                                                              | [59]      |
| China       | Yangzhou University, Jiangsu Province; Hunan Agricultural University, Hunan Province; and Guangdong Academy of Agricultural Sciences, Guangdong Province (ES) | RP             | 7.88                            | 7.91                            | 0.5                     | NS; experiments at three locations, 1 <sup>st</sup> location = 8.5% more yield with SRI; 2 <sup>nd</sup> location = 8.8% less with SRI, 3 <sup>rd</sup> location = 0.8% less with SRI; 11 plants m <sup>-2</sup> (30x30 cm) of SRI was compared with 25 plants m <sup>-2</sup> of CMP; SRI had no advantage over the conventional system, and reports of extraordinary high yields are the consequence of measurement error; seed and water savings with SRI not considered. | [5]       |
| China       | Zhejiang University, Huajia Chi Campus, Hangzhou (ES)                                                                                                         | RP             | 5.85                            | 6.61                            | 13                      | Under SRI management, internal use efficiency of N, P, and K increased by 22%, 19%, and 17%, respectively; irrigation water application was reduced by 26%; total WUE and irrigation WUE were increased by 54% and 90%, respectively.                                                                                                                                                                                                                                        | [60]      |
| China       | Huajiachi Experimental Station, Zhejiang University, Hangzhou (ES)                                                                                            | RP             | 5.38                            | 6.54                            | 22                      | Water saving under SRI was 40-47%; higher agronomic nitrogen use efficiency (ANUE) and partial factor productivity (PPF) were found.                                                                                                                                                                                                                                                                                                                                         | [61]      |

|        |                                                                                  |    |      |      |     |                                                                                                                                                                                                                                                                                                                                                                                                                                                                                                |          |
|--------|----------------------------------------------------------------------------------|----|------|------|-----|------------------------------------------------------------------------------------------------------------------------------------------------------------------------------------------------------------------------------------------------------------------------------------------------------------------------------------------------------------------------------------------------------------------------------------------------------------------------------------------------|----------|
| China  | Agricultural Experimental Farm of Zhejiang University in Zhejiang Province (ES)  | RP | 6.28 | 7.94 | 26  | Under SRI, water use was reduced by 461.5 mm compared to CMP; SRI increased water use efficiency by 91% and irrigation water use efficiency by 195%; compared to CMP, SRI significantly increased both microbial biomass carbon (MBC) and microbial biomass nitrogen (MBN).                                                                                                                                                                                                                    | [62]     |
| Gambia | Sapu Research Station, National Agricultural Research Institute (ES)             | RP | 2.50 | 7.30 | 192 | Highest grain yield under SRI was observed at very high nitrogen dose, i.e., 280 kg ha <sup>-1</sup> (8 t ha <sup>-1</sup> ); water productivity (WP) improved from 0.14 to 0.76 g grain kg <sup>-1</sup> total water input; net return was \$37 ha <sup>-1</sup> with conventional methods and \$853 ha <sup>-1</sup> with SRI.                                                                                                                                                               | [63]     |
| Gambia | Sapu Research Station, National Agricultural Research Institute (ES)             | RP | 2.5  | 7.60 | 204 | SRI with various spacings compared; at 30 x 30 cm, grain yield was 6.6 t ha <sup>-1</sup> vs. 1.7 t ha <sup>-1</sup> under CMP; at 40 x 40 cm, SRI yield was 4.7 t ha <sup>-1</sup> vs. 1.3 t ha <sup>-1</sup> under CMP.                                                                                                                                                                                                                                                                      | [64]     |
| Ghana  | Golinga Irrigation Field, Tolon (ES)                                             | FP | 2.41 | 4.03 | 67  | Nutrient management in SRI was modified, and highest yield was found when some mineral fertilizers were used.                                                                                                                                                                                                                                                                                                                                                                                  | [65]     |
| India  | Five Villages in Kancepuram District, Tamil Nadu (OFT)                           | FP | 6.10 | 7.34 | 20  | Highest grain yield and income were obtained with manual-transplanted SRI followed by machine-transplanted SRI; however, B:C ratio was more in machine-transplanted SRI as labor requirement was lowest.                                                                                                                                                                                                                                                                                       | [66]     |
| India  | Dharwad District, Karnataka (SU)                                                 | FP | 2.19 | 3.07 | 40  | 62 each of SRI farmers and conventional farmers were surveyed; found SRI requires 87% less seed, produces 40% more rice, and gives 76% greater economic returns.                                                                                                                                                                                                                                                                                                                               | [67]     |
| India  | G. B. Pant University of Agriculture and Technology, Pantnagar, Uttarakhand (ES) | RP | 5.22 | 6.10 | 17  | Wider spacing was found superior to closer spacing; 25x25 cm gave higher yield than 20x20 cm; SRI had higher water productivity, by 19%, over CMP.                                                                                                                                                                                                                                                                                                                                             | [68, 69] |
| India  | Krishi Vigyan Kendra, Jagatsinhpur, Odisha (ES)                                  | RP | 4.51 | 5.49 | 22  | Modified SRI at 25x12.5 cm spacing and 2 seedlings hill <sup>-1</sup> gave highest yield 6.1 t ha <sup>-1</sup> .                                                                                                                                                                                                                                                                                                                                                                              | [70]     |
| India  | Directorate of Rice Research Farm, ICRISAT, Hyderabad (ES)                       | RP | 4.69 | 5.24 | 12  | Compared SRI-Organic, SRI-INM, and BMP; during kharif, highest yield was with SRI-INM; SRI-Organic had lower yield than BMP during kharif season, but higher yield during the rabi season; SRI practices created favorable conditions for beneficial soil microbes to prosper, saved water, and increased yield.                                                                                                                                                                               | [71]     |
| India  | Janagaon Region, Warangal District, AP (Primary data)                            | FP | 4.83 | 7.61 | 58  | Data from 30 SRI farmers, matched with 30 non-SRI farmers; under SRI, GHG emissions ha <sup>-1</sup> were 40% lower, groundwater extraction was 60% less, and fossil energy use was lower by 74%; under SRI, production costs were reduced significantly ha <sup>-1</sup> ; returns ha <sup>-1</sup> after costs increased by 400%.                                                                                                                                                            | [38]     |
| India  | Indian Institute of Pulses Research (ICAR-IIPR), Kanpur (ES)                     | RP | 5.39 | 5.09 | -6  | SRI practices increased the water productivity by 44% over the conventional transplanted flooded rice.                                                                                                                                                                                                                                                                                                                                                                                         | [72]     |
| India  | South Garo Hills, Meghalaya (FF)                                                 | FP | 1.85 | 5.74 | 210 | SRI method of rice cultivation could save seeds (97%), and water (78%) and reduce cost (70%), with higher yield, all compared to conventional rice culture in the area.                                                                                                                                                                                                                                                                                                                        | [73]     |
| India  | Indian Agricultural Research Institute, New Delhi (ES)                           | RP | 5.88 | 5.62 | -4  | NS; SRI and modified SRI methods were effective in reducing global warming potential by 28-30% and saving water by 36% without yield penalty.                                                                                                                                                                                                                                                                                                                                                  | [36]     |
| India  | Banaras Hindu University, Uttar Pradesh (ES)                                     | RP | 5.66 | 6.53 | 15  | Application of 50% recommended dose of N along with 50% N through FYM and <i>Azospirillum</i> gave the highest grain yield, protein content, nutrient uptake, and water productivity together with SRI.                                                                                                                                                                                                                                                                                        | [74]     |
| India  | Central Rice Research Institute, Cuttack, Odisha (ES)                            | RP | 4.52 | 3.77 | -17 | Low plant density (30 x 30 cm) of SRI resulted in lower yield and higher labor cost, which reduced net returns (2,650 vs. 9,312 INR ha <sup>-1</sup> ) compared to traditional methods of cultivation; mechanized planting and weeding of SRI enhanced its productivity to 4.24 t ha <sup>-1</sup> but age of seedlings should increase from 8 to 16 days and density of hills should increase from 11 to 31/m <sup>2</sup> with 4 seedlings, instead of single seedlings hill <sup>-1</sup> . | [75]     |

|           |                                                                    |    |      |      |    |                                                                                                                                                                                                                                                                                                                                                                                                                 |      |
|-----------|--------------------------------------------------------------------|----|------|------|----|-----------------------------------------------------------------------------------------------------------------------------------------------------------------------------------------------------------------------------------------------------------------------------------------------------------------------------------------------------------------------------------------------------------------|------|
| India     | Lower Palar Sub-Basin, Kancheepuram District, Tamil Nadu (OFT)     | FP | 5.14 | 6.21 | 21 | Demonstration of green manure followed by SRI was done in 120 ha area of 120 farmers.                                                                                                                                                                                                                                                                                                                           | [76] |
| India     | Villupuram District, Tamil Nadu (FF)                               | RP | 5.35 | 6.41 | 20 | Income increased by 44.5%, saving of irrigation water by 42%, 17% lesser labor, and 87% lesser seed cost with SRI.                                                                                                                                                                                                                                                                                              | [77] |
| India     | Mahabubnagar District, Andhra Pradesh (FF)                         | FP | 4.55 | 5.39 | 19 | Higher net return (52%) and saving of water (52%) with SRI.                                                                                                                                                                                                                                                                                                                                                     | [78] |
| India     | Indian Agricultural Research Institute (IARI), New Delhi (ES)      | RP | 5.23 | 5.13 | -2 | NS; 26% total water saving and 36 % irrigation water saving with SRI compared to CMP.                                                                                                                                                                                                                                                                                                                           | [79] |
| India     | Tamil Nadu Agricultural University, Coimbatore (ES)                | RP | 6.21 | 6.44 | 4  | Improvement in water productivity in SRI was 0.72 kg rice m <sup>-3</sup> water vs. 0.44 kg m <sup>-3</sup> with CMP.                                                                                                                                                                                                                                                                                           | [80] |
| India     | Tamil Nadu Agricultural University, Coimbatore (ES)                | RP | 6.10 | 6.30 | 3  | Improvement in water productivity in SRI was 0.61 kg rice m <sup>-3</sup> water vs. 0.40 kg m <sup>-3</sup> with CMP.                                                                                                                                                                                                                                                                                           | [81] |
| India     | Islamabad Region, Anantnag District, Kashmir (ES & FF)             | RP | 3.15 | 4.15 | 32 | With SRI, water savings of 40%; with increase in net income by 57% compared to the conventional rice farming methods.                                                                                                                                                                                                                                                                                           | [82] |
| India     | Indian Agricultural Research Institute, New Delhi (ES)             | RP | 5.50 | 5.40 | -2 | NS; similar yields with organic, INM and inorganic nutrient management; water saving with SRI 35%; water productivity 5.3 vs 3.5 kg ha-mm <sup>-1</sup> .                                                                                                                                                                                                                                                       | [83] |
| India     | Indian Agricultural Research Institute, New Delhi (ES)             | RP | 4.89 | 4.72 | -4 | NS; a saving of 8-9 irrigations with SRI; water saving of 35%, with improvement in water productivity with SRI.                                                                                                                                                                                                                                                                                                 | [84] |
| India     | Tripura State (FF)                                                 | RP | 4.47 | 5.99 | 12 | Quantity of water (in liters) required to produce 1 kg rice: 1,498 with SRI, 1,883 with CMP,                                                                                                                                                                                                                                                                                                                    | [85] |
| India     | Purulia District, West Bengal (FF)                                 | FP | 3.98 | 5.25 | 32 | Data from 100 farmers; 1 kg of seed with SRI produced 846 kg of paddy vs. 4 kg with the conventional methods; net returns were higher by 67%; labor inputs were reduced by 8%.                                                                                                                                                                                                                                  | [86] |
| India     | Indian Agricultural Research Institute, New Delhi (ES)             | RP | 4.53 | 5.03 | 11 | Global warming potential was highest in CMP (807.4 kg CO <sub>2</sub> ha <sup>-1</sup> ) and lowest in SRI (498.25 kg CO <sub>2</sub> ha <sup>-1</sup> ). SRI required six irrigations lesser than CMP, resulted in 27.4 % irrigation water and 18.5 % total water saving. Water productivity of SRI (3.56 kg ha-mm <sup>-1</sup> ) was significantly higher as compared to CMP (2.61 kg ha-mm <sup>-1</sup> ). | [87] |
| India     | College of Agriculture, JNKVV, Jabalpur, Madhya Pradesh (ES)       | RP | 4.26 | 4.87 | 14 | Highest grain yield, net returns, and B:C ratio were achieved with application of 75% RDN+ 25% N through vermicompost under SRI.                                                                                                                                                                                                                                                                                | [88] |
| India     | Indian Institute of Water Management, Odisha (ES)                  | RP | 4.49 | 6.38 | 42 | Physiological basis for SRI yield enhancement were explained in this paper.                                                                                                                                                                                                                                                                                                                                     | [18] |
| India     | Indian Institute of Water Management, Odisha (ES)                  | RP | 4.40 | 6.51 | 48 | Water saving of 22% compared with CMP rice; water productivity with AWD-SRI management practices was almost doubled (0.68 g rice l <sup>-1</sup> ) compared to CF-CMP (0.36 g l <sup>-1</sup> ).                                                                                                                                                                                                                | [10] |
| India     | Indian Institute of Water Management, Odisha (ES)                  | RP | 4.10 | 5.51 | 34 | SRI and CMP with two nutrient regimes compared integrated nutrient management (INM) and organic management. INM out-yielded organic nutrient management in both systems; however, both SRI-INM and SRI-organic out-yielded CMP-INM and CMP-organic, by 44% and 25%, respectively. Grains obtained with SRI methods contained more nutrients than those produced with CMP.                                       | [25] |
| India     | Indira Gandhi Krishi Vishwavidyalaya, Raipur, Chhattisgarh (ES)    | RP | 6.50 | 7.39 | 14 | Modified SRI (10 d-old seedlings+100% inorganic or 50% organic+50% inorganic + irrigation as per SRI) gave higher grain yield and higher net income (17%) over RMP with hybrid rice.                                                                                                                                                                                                                            | [89] |
| Indonesia | Ujung Alang Village, Cilacap District, Central Java Province (OFT) | RP | 5.42 | 9.55 | 76 | For saline soil of mangroove forest area, SRI along with deep furrows powdered with limestone reduced the use of synthetic fertilizers by 40% and variable costs by 8%,                                                                                                                                                                                                                                         | [90] |

|            |                                                                                      |    |      |       |     |                                                                                                                                                                                                                                                                                                                                                                                                                             |          |
|------------|--------------------------------------------------------------------------------------|----|------|-------|-----|-----------------------------------------------------------------------------------------------------------------------------------------------------------------------------------------------------------------------------------------------------------------------------------------------------------------------------------------------------------------------------------------------------------------------------|----------|
|            |                                                                                      |    |      |       |     | increased the B/C ratio by 95% and crop productivity by 76%, compared to the methods recommended by scientists, and increased the B/C ratio by 161% and crop productivity by 133% compared to conventional farmer methods.                                                                                                                                                                                                  |          |
| Indonesia  | Sindang Barang, Jero Village, Bogor, West Java (FF)                                  | RP | 6.18 | 7.70  | 25  | SRI improved physiological parameters as well as N and P uptake.                                                                                                                                                                                                                                                                                                                                                            | [91]     |
| Indonesia  | Wonogiri District, Central Java Province (FF)                                        | RP | 8.39 | 9.44  | 13  | Greater yield increase by SRI could be achieved by improving nutrient and water management during the reproductive stage.                                                                                                                                                                                                                                                                                                   | [92]     |
| Indonesia  | Labtek XI School of Life Sciences & Technology, West Java (SD)                       | RP | 4.50 | 7.50  | 67  | SRI was evaluated as a methodology to address climate change, saving water by 30% with significantly higher yield.                                                                                                                                                                                                                                                                                                          | [93]     |
| Iraq       | Al-Mishkhab Rice Research Station, Najaf (ES)                                        | FP | 3.75 | 5.25  | 40  | Three-fold increase in water use efficiency for SRI (0.291 kg m <sup>-2</sup> ) compared with non-SRI cultivation (0.108 kg m <sup>-2</sup> ); SRI practices reduced the need for irrigation water by 39%.                                                                                                                                                                                                                  | [21]     |
| Japan      | Chiba Prefecture (ES)                                                                | RP | 7.37 | 7.40  | 0.5 | NS; 28% water saving with SRI; water productivity was 1.74 g rice l <sup>-1</sup> of water with SRI vs. 1.23 g l <sup>-1</sup> with CMP; seedling age of 14 vs. 21 d had no significant impact on yield.                                                                                                                                                                                                                    | [17]     |
| Japan      | Chiba Prefecture (ES)                                                                | RP | 6.70 | 6.30  | -6  | NS; SRI-organic and conventional-inorganic had same yield; SRI practices improved root growth, tillering etc.; additionally, SRI crop had lesser incidence of pests and diseases, a shorter crop cycle, and improved plant stand; net returns from SRI-organic were increased by approx. 1.5 times in spite of the additional labor requirements for weed control.                                                          | [94]     |
| Kenya      | Mwea Irrigation Agricultural Development Centre Research, Kirinyaga County (ES)      | FP | 4.71 | 6.89  | 46  | Labor cost for SRI was cheaper than with the common farmer practice.                                                                                                                                                                                                                                                                                                                                                        | [95]     |
| Kenya      | Mwea Irrigation Scheme, Kirinyaga District (FF)                                      | FP | 5.00 | 9.60  | 92  | Need of capacity-building and training on SRI                                                                                                                                                                                                                                                                                                                                                                               | [96]     |
| Kenya      | Mwea Irrigation Scheme, Kirinyaga District (Secondary data from farmers in 18 units) | FP | 5.14 | 6.80  | 32  | Apart from yield advantage under SRI management, seed requirements were reduced by 87% and water savings by 28%. On average, SRI required 9% more labor than FP, but in three units, labor costs were reduced by an average of 13%. In first season, SRI required 30% more labor for weeding than FP, but it reduced to 15% in next season when weeders became available. SRI had higher B:C ratio than FP (1.82 vs. 1.33). | [97]     |
| Kenya      | Mwea Irrigation Agricultural Development Centre Research Station (ES)                | RP | 8.66 | 14.85 | 72  | 24% saving in irrigation water; land productivity and water productivity were increased by 71% and 90%, compared with RP.                                                                                                                                                                                                                                                                                                   | [98]     |
| Korea      | Kangwon National University, Chuncheon (ES)                                          | RP | 5.35 | 4.90  | -8  | SRI yield (50 x 50 cm) = 4.08 t ha <sup>-1</sup> , (40x40 cm) = 4.4 t ha <sup>-1</sup> , (30x30 cm) = 4.9 t ha <sup>-1</sup> , control (30 x 15 cm) = 5.4 t ha <sup>-1</sup> . Irrigation water saving with SRI was 56% less than on control plots. SRI could be successfully adopted and could save a significant amount of irrigation requirement in paddies and reduce non-point source (NPS) pollution discharge.       | [39, 99] |
| Madagascar | Center for Diffusion of Intensified Agriculture, Beforona (ES)                       | RP | 4.92 | 6.26  | 27  | SRI compared with SRA (System of Improved Rice Culture); yield under farmer's practice (FP) was 2.63 t ha <sup>-1</sup> .                                                                                                                                                                                                                                                                                                   | [22]     |
| Mali       | Goundam and Dire, Timbuktu (FF)                                                      | RP | 5.49 | 9.10  | 66  | Grain yield in farmers practice (FP) was 4.86 t ha <sup>-1</sup> ; 5 varieties were tested and all had higher grain yield under SRI than control (RP) and FP.                                                                                                                                                                                                                                                               | [100]    |
| Myanmar    | Pwint Phyu Seed Farm (ES)                                                            | FP | 6.82 | 6.59  | -3  | NS; statistically similar grain yield but SRI emitted less greenhouse gases (GHGs) than FP; could be a better alternative method.                                                                                                                                                                                                                                                                                           | [101]    |
| Myanmar    | Kachin and Shan States (FFS)                                                         | FP | 2.10 | 6.40  | 205 | Data from 612 farmers participated in 30 farmer field school (FFS)                                                                                                                                                                                                                                                                                                                                                          | [102]    |
| Nepal      | Regional Agricultural Research Station, Banke District (ES)                          | RP | 5.10 | 6.10  | 20  | <i>Trichoderma</i> inoculation improved yield in Organic-SRI, Inorganic SRI yielded 4.8 t ha <sup>-1</sup> .                                                                                                                                                                                                                                                                                                                | [103]    |

|             |                                                                          |    |      |      |     |                                                                                                                                                                                                                                                                                                                                                                            |       |
|-------------|--------------------------------------------------------------------------|----|------|------|-----|----------------------------------------------------------------------------------------------------------------------------------------------------------------------------------------------------------------------------------------------------------------------------------------------------------------------------------------------------------------------------|-------|
| Pakistan    | Agricultural Research Institute, Mingora (ES)                            | RP | 4.64 | 4.82 | 4   | NS; study compared different fertilizer treatments in three rice varieties.                                                                                                                                                                                                                                                                                                | [104] |
| Panama      | Provinces of Veraguas, Cocle, Panama, Colon, and Herrera (OFT)           | FP | 3.44 | 4.75 | 38  | Data shown are average yield from 10 farms; at Cocuyal, La Mata and Las Lajas, yields increase by > 90% with SRI; in Barrigon, Loma, Cope, and Palmilla, yields increased by 30%; at San Juan and La Puente, yields with SRI were lower by 8 and 6%, respectively; SRI practices showed potential to increase yields by over 90%, while reducing water consumption by 86%. | [105] |
| Philippines | Different locations (FF)                                                 | FP | 2.70 | 3.82 | 42  | High yield was achieved combining transplanting of 8-10 day-old single seedlings at 40 x 40 cm spacing, with organic fertilization, and intermittent irrigation.                                                                                                                                                                                                           | [106] |
| Sanegal     | Africa Rice Center, Senegal River Valley, Ndiaye Arrondissement (ES)     | RP | 6.88 | 6.57 | -5  | NS; an average of 27% less water was applied to SRI than required for continuous flooding in CMP, resulting in higher water productivity with SRI; when weeds are controlled, good yields and significant water savings can be achieved with SRI.                                                                                                                          | [107] |
| Senegal     | Ziguinchor Province (FF)                                                 | FP | 2.27 | 3.94 | 74  | Benefit/cost ratio was found to be higher with SRI (1.5) than with TP (1.2); SRI required technical know-how for its implementation, hence greater cost of production; however, SRI was found to be more productive and profitable than the traditional system.                                                                                                            | [108] |
| Sri Lanka   | Rice Research & Development Institute, Batalagoda (ES)                   | RP | 6.68 | 6.44 | -4  | NS; plant spacing used for SRI was 30 x 30 cm; the reduced seeding rate was so great that it raised seed productivity 5-fold.                                                                                                                                                                                                                                              | [109] |
| Taiwan      | Chianan Plain, Tainan (ES)                                               | RP | 3.70 | 5.80 | 57  | Fungicide use to control blast gave highest yield of 6.5 t ha <sup>-1</sup> ; single seedling hill <sup>-1</sup> gave more yield than using two or three seedlings hill <sup>-1</sup> .                                                                                                                                                                                    | [110] |
| Tanzania    | Kilombero District, Morogoro Region (SU)                                 | FP | 2.65 | 6.73 | 154 | Data from 194 SRI and 140 non-SRI farmers; standard deviation was very large; SRI was found to be non-profitable because of lower selling price of SRI rice enforced contractually by KBL; this study found SRI to be climate-friendly agricultural practice requiring institutional reform and support.                                                                   | [111] |
| Tanzania    | Mvomero District, Morogoro Region (FFS)                                  | FP | 3.83 | 4.76 | 24  | Above 60% water saving with SRI compared to conventional method.                                                                                                                                                                                                                                                                                                           | [112] |
| Tanzania    | Chimala, Mbarali District, Beya Region (FF)                              | FP | 5.00 | 8.20 | 64  | Production cost was higher for SRI; however, SRI rice was found better for seed production, and grain had higher aroma and fragrance.                                                                                                                                                                                                                                      | [113] |
| Tanzania    | Lekitatu Irrigation Scheme, Meru District, Arusha (FF)                   | FP | 4.80 | 8.50 | 77  | Highest grain yield and water productivity were obtained with SRI using single seedlings 15 days old at 25 x 25 cm spacing; based on the local rice farming conditions, researchers recommended 2 <sup>nd</sup> best practices of SRI, i.e., intermittent irrigation with two 21-day seedlings at 20 x 20 cm spacing.                                                      | [114] |
| Tanzania    | Mkindo Farmer-Managed Irrigation Scheme, Mvomero District, Morogoro (FF) | RP | 5.70 | 6.70 | 18  | Rice grain yield, agronomic nitrogen use efficiency (ANUE), and partial factor productivity (FPF) were higher in SRI than in CMP at all levels of N application that were compared.                                                                                                                                                                                        | [115] |
| Tanzania    | Mkindo Farmer-Managed Irrigation Scheme, Mvomero District, Morogoro (FF) | RP | 4.20 | 6.40 | 52  | As above                                                                                                                                                                                                                                                                                                                                                                   | [115] |
| Tanzania    | Kilombero Plantation Ltd., Kilombero District, Morogoro Region (FF)      | FP | 2.90 | 4.70 | 62  | Additional income of 119-137 USD ha <sup>-1</sup> resulted from adopting SRI; the impact of training on modified SRI was studied in this paper.                                                                                                                                                                                                                            | [116] |
| Thailand    | Kasetsart University (ES)                                                | RP | 3.56 | 5.43 | 53  | SRI crop had higher number of leaves, leaf area, tillers, and filled grains; hydro-priming improved seed germination, seedling development, and rice yield; SRI also improved water use efficiency (WUE).                                                                                                                                                                  | [117] |

|             |                                                |    |      |      |     |                                                                                                                                                                                                                                                                                                                                                                                                                            |       |
|-------------|------------------------------------------------|----|------|------|-----|----------------------------------------------------------------------------------------------------------------------------------------------------------------------------------------------------------------------------------------------------------------------------------------------------------------------------------------------------------------------------------------------------------------------------|-------|
| Timor Leste | Bobonaro and Covalima Districts (SD)           | FP | 3.24 | 2.94 | -9  | NS; for Timor Leste, SRI may not be beneficial compared to conventional rice grown under favorable conditions; as the dissemination of SRI is in its early stage, average productivity was low and could increase in subsequent years; the variable cost of production was lower on SRI plots, largely because SRI farmers spent significantly less on seeds; they did not find a significant differences in labor inputs. | [118] |
| Timor Leste | Covalima, Bobonaro and Viqueque Districts (FF) | FP | 2.50 | 5.00 | 100 | SRI introduced to 11 cooperatives by Oxfam New Zealand; cost per hectare was raised from \$640 ha <sup>-1</sup> to \$850, but net profit ha <sup>-1</sup> was increased from \$595 to \$2,198.                                                                                                                                                                                                                             | [119] |

Settings: Farmer's fields (FF); Experiment. Station (ES); Farmers Field Schools (FFS); On-farm trials (OFT); Secondary data (SD); Survey (SU).

Conventional management practices (CMP) classified as Recommended practices (RP) or Farmer's practices (FP). DS: Dry season. WS: Wet season. NS: Not significant

**Table S2.** Reported large-scale studies and meta-analyses comparing SRI with conventional management practices (CMP) in different countries

| Country                | No. of farmers/<br>trials / area                    | SRI yield<br>(t ha <sup>-1</sup> ) | CMP yield<br>(t ha <sup>-1</sup> ) | SRI yield increase<br>(%) | SRI water saving<br>(%) | SRI impact on cost ha <sup>-1</sup><br>(Δ%) | SRI impact on income<br>ha <sup>-1</sup> (Δ%) | Comments                                                                                                                                                          | References |
|------------------------|-----------------------------------------------------|------------------------------------|------------------------------------|---------------------------|-------------------------|---------------------------------------------|-----------------------------------------------|-------------------------------------------------------------------------------------------------------------------------------------------------------------------|------------|
| Bangladesh             | 1,073 farmers                                       | 6.7                                | 5.4<br>(FP)                        | 26                        | NM                      | -7                                          | +59                                           | Study over two years by 3 NGOs and Syngenta/BD under the auspices of IRRI/Bangladesh                                                                              | [120]      |
| Cambodia               | 500 farmers                                         | 2.3                                | 1.6<br>(FP/RF)                     | 41                        | Rainfed                 | -56                                         | +74                                           | Study done for GTZ (GIZ) with random selections of SRI and non-SRI farmers in 5 provinces.                                                                        | [121]      |
| Cambodia               | 120 farmers                                         | 2.8                                | 1.3<br>(FP/RF)                     | 105                       | Rainfed                 | -47                                         | +98                                           | Study of all the farmers in Cambodia who had used SRI practices for 3 years, by NGO (CEDAC).                                                                      | [13]       |
| China                  | Meta-analysis of 17 published research papers       | 8.3                                | 7.5<br>(RP)                        | 10.9                      | NM                      | NM                                          | NM                                            | 26 sets of trials reported by Chinese researchers in the published literature (most in Chinese).                                                                  | [9]        |
| China                  | 82 farmers                                          | 9.5                                | 6.6<br>(FP)                        | 42                        | 44                      | -7                                          | +64                                           | Village study by China Agricultural University in Sichuan province.                                                                                               | [122]      |
| China (Sichuan)        | > 400,000 ha                                        | 9.0                                | 7.6<br>(FP)                        | 18.4                      | 25                      | NR                                          | NR                                            | Between 2004 and 2012, the area under SRI management in Sichuan Province rose from 1,132 ha to >400,000 ha.                                                       | [123]      |
| Eight countries        | Meta-analysis of 29 published research papers       | 5.9                                | 5.3<br>(RP)                        | 11                        | 22                      | NM                                          | NM                                            | 251 trials from 8 countries reported in the published literature were analyzed; data mostly from ES, with some FF studies.                                        | [14]       |
| India                  | 2,234 farmers (across 13 states of India)           | 4.6                                | 3.8<br>(FP)                        | 22                        | NM                      | NM                                          | +18                                           | IWMI-Tata Policy Program study; not all used SRI fully: farmers adopting some of the SRI practices but not necessarily all got higher yields and income.          | [124]      |
| India                  | Experiments @ 25 locations across India (2013-2017) | -                                  | -                                  | Up to 55                  | -                       | -22.7<br>(survey of 262 farmers)            | -                                             | SRI reduced total energy inputs for rice production by 4,350 MJ ha <sup>-1</sup> ; also, higher energy productivity and lower greenhouse gas emissions under SRI. | [16]       |
| India (Andhra Pradesh) | 1,525 farmers across all districts of state         | 8.7                                | 6.3<br>(RP)                        | 34                        | 40                      | NM                                          | NM                                            | Evaluations by Andhra Pradesh state university (ANGRAU).                                                                                                          | [80]       |

|                                                                  |                                                                             |      |             |      |     |      |                              |                                                                                                                                                                                                                                                                              |       |
|------------------------------------------------------------------|-----------------------------------------------------------------------------|------|-------------|------|-----|------|------------------------------|------------------------------------------------------------------------------------------------------------------------------------------------------------------------------------------------------------------------------------------------------------------------------|-------|
| India (Bihar)                                                    | 8,055 ha (100,000 farmers)                                                  | 3.3  | 1.6 (FP)    | 86   | NM  | +20  | +250                         | Evaluation of JEEVIKA program supported by World Bank (2007-2012).                                                                                                                                                                                                           | [125] |
| India (Jharkhand)                                                | 3,317 ha (34,170 farmers)                                                   | 6.9  | 3.6 (FP)    | 96   | NM  | 0    | +95                          | 2-year trial by National Bank for Agriculture and Rural Development (NABARD) support.                                                                                                                                                                                        | [126] |
| India (Tamil Nadu)                                               | 17,981 ha; 19,497 demonstrations                                            | 4.5  | 3.2 (FP)    | 33   | 41  | NM   | NM                           | Irrigated Agriculture Modernization and Water Bodies Restoration and Management Project funded by World Bank with assistance from Tamil Nadu Agricultural University (2007-11); of 1.9 m ha of total rice area in Tamil Nadu state, the area under SRI was 1.0 m ha by 2012. | [127] |
| Indonesia                                                        | 12,133 farmers; 9,133 ha                                                    | 7.6  | 4.3 (FP)    | 78   | 40  | -20  | +100                         | On-farm comparison trials managed by Nippon Koei TA team across 8 provinces (2002-06).                                                                                                                                                                                       | [128] |
| Lower Mekong River Basin (Cambodia, Laos, Vietnam, and Thailand) | 405 experiments at 172 sites in 32 districts of 11 provinces; 5,000 farmers | 4.72 | 3.1 (FP/RF) | 66.5 | NR  | NR   | +93                          | Farmer participatory project funded by European Union as a part of its Food Security Thematic Program of its Global Program on Agricultural Research for Development.                                                                                                        | [129] |
| Lower Mekong River Basin (Cambodia, Lao PDR, Thailand, Vietnam)  | 1,500 experiments; with >15,000 farmers in 33 districts of 11 provinces     | -    | - (FP/RF)   | 52   | 61  |      | +70                          | With SRI methods adapted to rainfed conditions; labor productivity increased by 64%; efficiency of mineral fertilizer-use went up by 163%; energy inputs required were decreased by 34%; GHG emissions were reduced by 14-17%.                                               | [15]  |
| Nepal (Morang District)                                          | 412 farmers                                                                 | 6.1  | 3.3         | 82   | 43  | -2.2 | +163                         | Trials managed by the District Agricultural Development Office in Biratnagar.                                                                                                                                                                                                | [130] |
| Nepal (Far Western Region)                                       | 890 farmers                                                                 | 7.6  | 4.0         | 88   | >60 | +32  | +164                         | Trials/demonstrations under EU-FAO Food Facility Program.                                                                                                                                                                                                                    | [131] |
| Sri Lanka                                                        | 120 farmers                                                                 | 5.5  | 3.8         | 44   | 24  | -12  | +104                         | International Water Management Institute (IWMI) study with random selection of 120 farmers in 2 districts                                                                                                                                                                    | [132] |
| Vietnam                                                          | 1,274 farmers                                                               | 6.8  | 5.6         | 22   | 33  | -30  | +36                          | Results of Ministry of Agricultural and Rural Development FFS trials on FFs in 13 districts.                                                                                                                                                                                 | [133] |
| Vietnam                                                          | > 1 million farmers on 185,000 ha                                           | NR   | NR          | 9-15 | 33  | NR   | US\$95 to \$260 <sup>a</sup> | Ministry of Agriculture and Rural Development with Oxfam America and civil society partners spread SRI use 22 to provinces.                                                                                                                                                  | [134] |



|                |            |            |            |            |             |            |
|----------------|------------|------------|------------|------------|-------------|------------|
| <i>Average</i> | <i>6.7</i> | <i>4.3</i> | <i>54%</i> | <i>39%</i> | <i>-12%</i> | <i>98%</i> |
|----------------|------------|------------|------------|------------|-------------|------------|

Source: Adapted from [135] and expanded with more recent information.

NM = Not measured. NR = Not reported. FFS = Farmer Field Schools. RF = Rainfed rice cultivation

CMP = Conventional management practices; RP = Recommended practices; FP = Farmer's practices

<sup>a</sup> In value, not percent.
